# Supplementary material for: A comparative transcriptional landscape of maize and sorghum obtained by single-molecule sequencing
Source: HighWire-hosted journal article supplement (doi:10.1101/gr.227462.117), 2018-04-30
Supplement: Supplemental_Fig_S1.pdf [file Supplemental_Fig_S1.pdf]

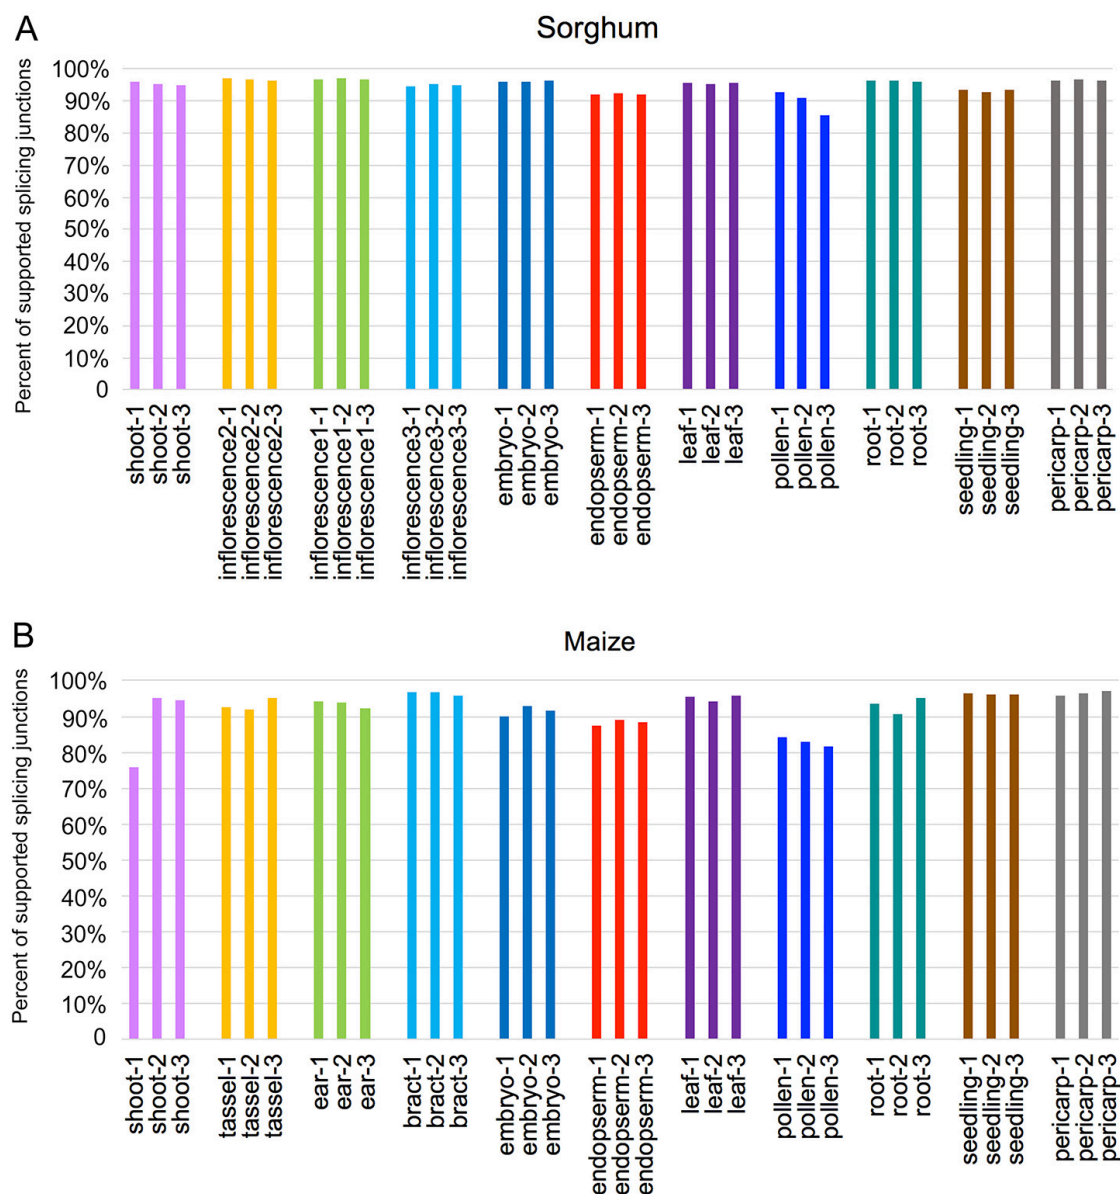

**Supplemental Figure S1:** Validation of PacBio isoforms by illumina short-reads sequencing. (A) Percent of supported PacBio isoforms of sorghum by short-reads sequencing. (B) Percent of supported PacBio isoforms of maize by short-reads sequencing.
