# Supplementary material for: A comparative transcriptional landscape of maize and sorghum obtained by single-molecule sequencing
Source: HighWire-hosted journal article supplement (doi:10.1101/gr.227462.117), 2018-04-30
Supplement: Supplemental_Fig_S4.pdf [file Supplemental_Fig_S4.pdf]

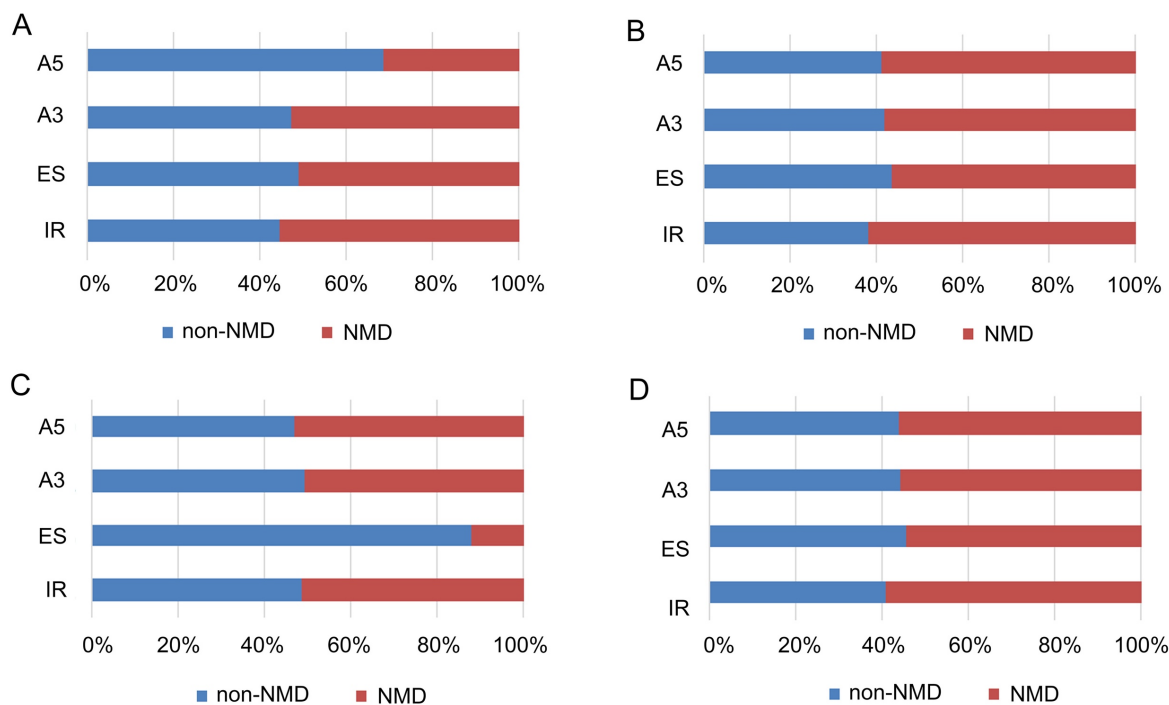

### Supplemental Figure S4: AS events coupled with NMD.

(A) Proportion of NMD and non-NMD in sorghum alternative splicing events. (B) Proportion of NMD and non-NMD in maize alternative splicing events. (C) Distribution of NMD and non-NMD among conserved splicing events in sorghum. (D) Distribution of NMD and non-NMD among conserved splicing events in maize.
