# Supplementary material for: A comparative transcriptional landscape of maize and sorghum obtained by single-molecule sequencing
Source: HighWire-hosted journal article supplement (doi:10.1101/gr.227462.117), 2018-04-30
Supplement: Supplemental_Fig_S5.pdf [file Supplemental_Fig_S5.pdf]

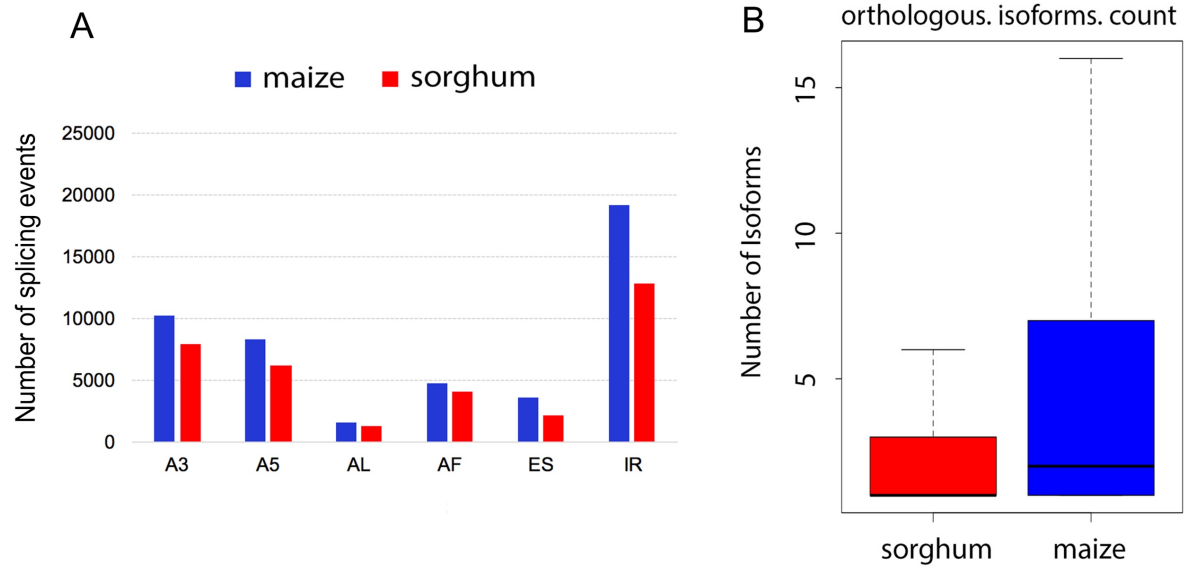

**Supplemental Figure S5: Comparison of isoform number and splicing pattern between maize and sorghum orthologous genes.**

(A) Splicing pattern distributions of maize and sorghum orthologous genes. (B) Number of isoforms per ortholog in maize and sorghum.
