# Supplementary material for: A comparative transcriptional landscape of maize and sorghum obtained by single-molecule sequencing
Source: HighWire-hosted journal article supplement (doi:10.1101/gr.227462.117), 2018-04-30
Supplement: Supplemental_Fig_S7.pdf [file Supplemental_Fig_S7.pdf]

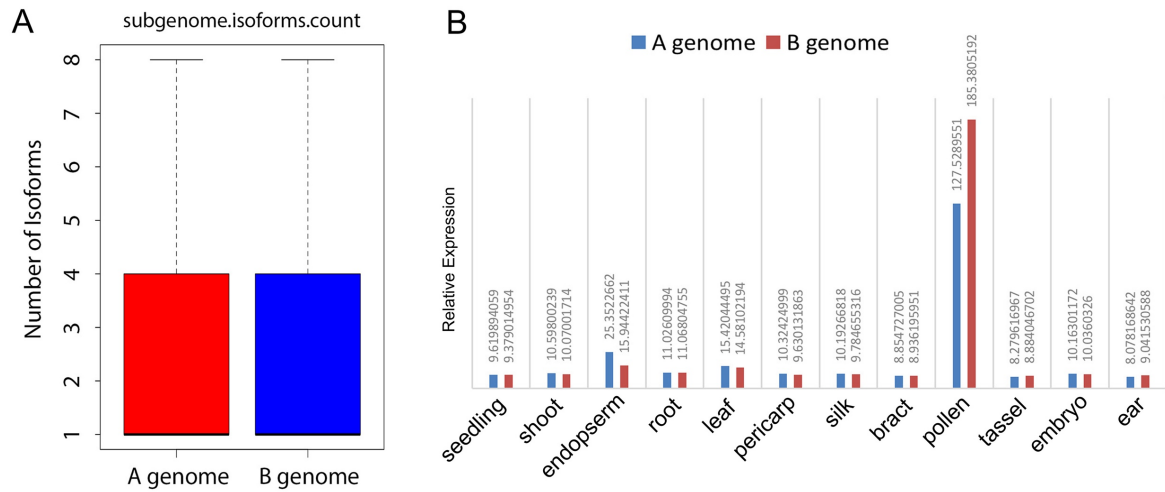

**Supplemental Figure S7:** Comparison of isoform number and gene expression between maize A and B genomes.

**(A)** Comparison of isoform numbers between maize A and B genomes. **(B)** Comparison of gene expression between maize A and B genomes.
