# Supplementary material for: A comparative transcriptional landscape of maize and sorghum obtained by single-molecule sequencing
Source: HighWire-hosted journal article supplement (doi:10.1101/gr.227462.117), 2018-04-30
Supplement: Supplemental_Fig_S10.pdf [file Supplemental_Fig_S10.pdf]

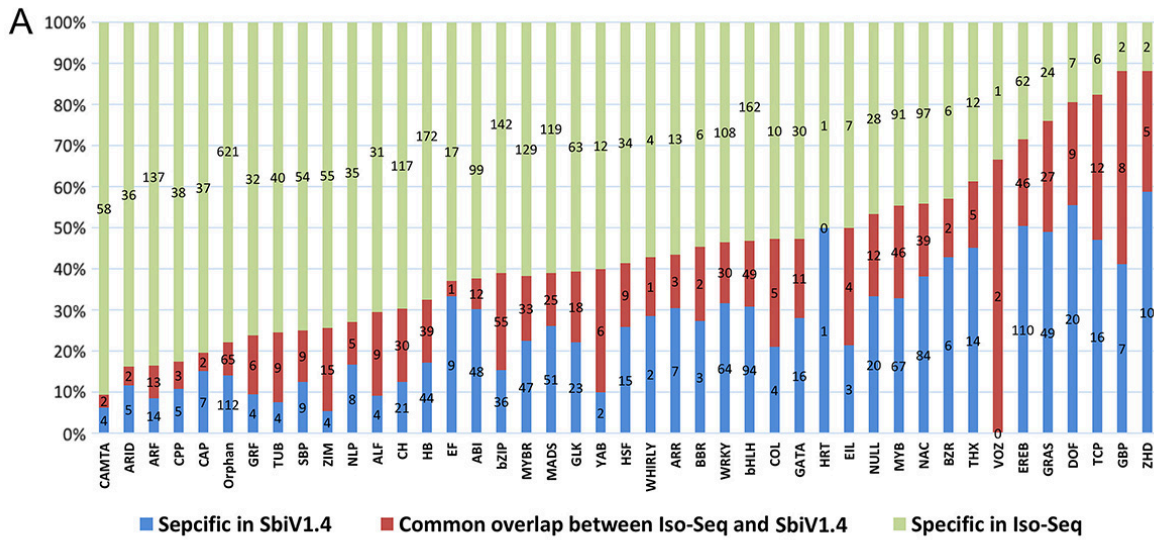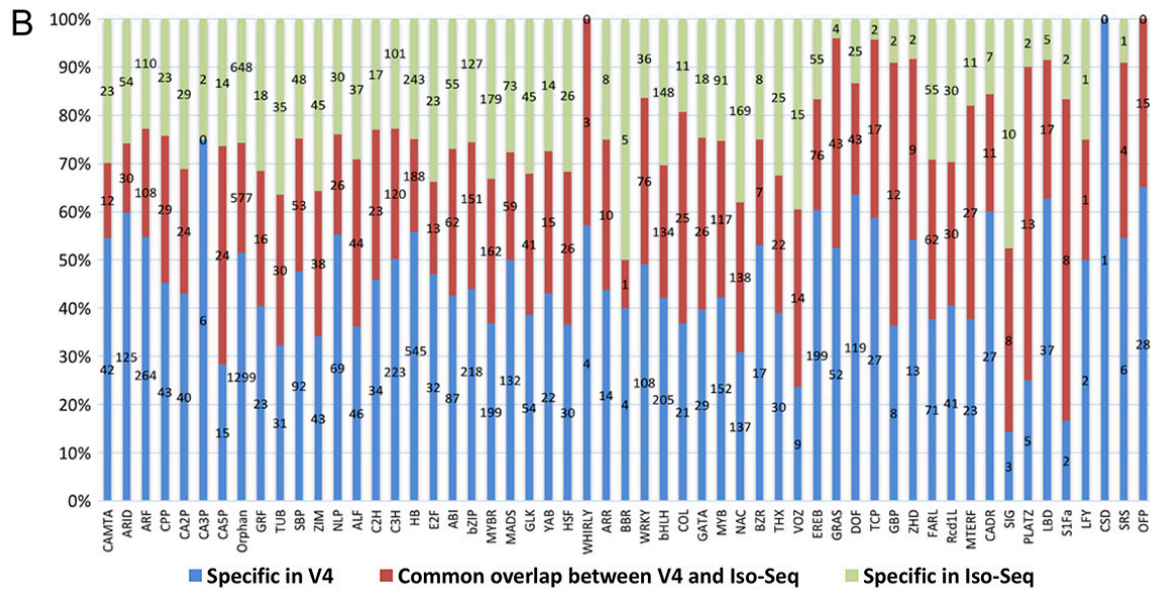

**Supplemental Figure S10: Characterization of transcription factors in maize and sorghum.**

**(A)** Characterization of transcription factors in sorghum. **(B)** Characterization of transcription factors in maize.
