# Supplementary material for: A comparative transcriptional landscape of maize and sorghum obtained by single-molecule sequencing
Source: HighWire-hosted journal article supplement (doi:10.1101/gr.227462.117), 2018-04-30
Supplement: Supplemental_Fig_S13.pdf [file Supplemental_Fig_S13.pdf]

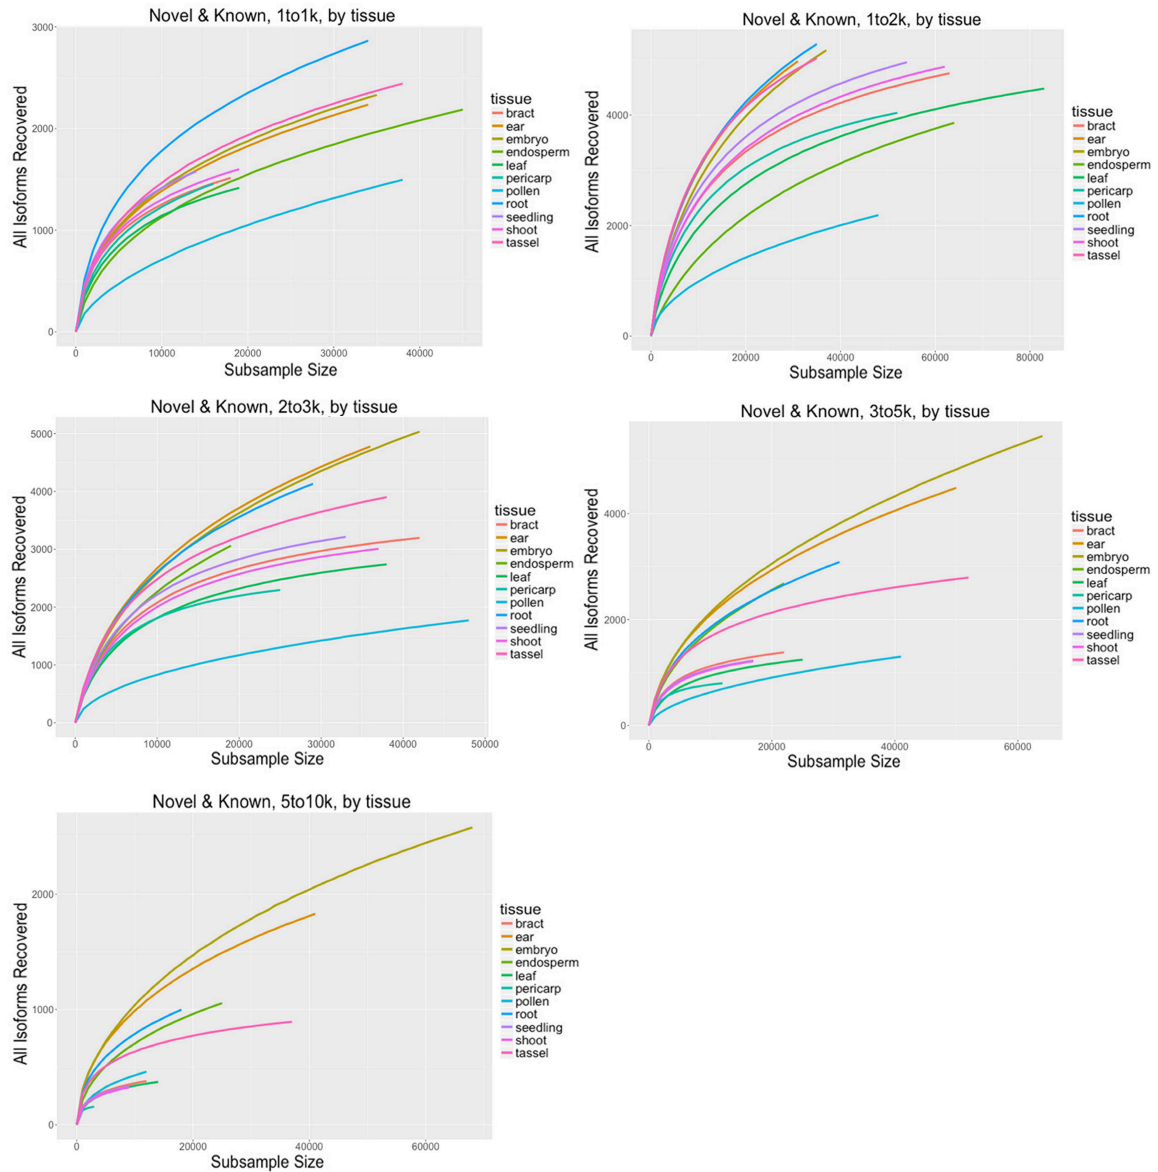

Supplemental Figure S13: Rarefaction analysis of isoforms in each tissue of maize across size fractions.
