# Supplementary material for: A comparative transcriptional landscape of maize and sorghum obtained by single-molecule sequencing
Source: HighWire-hosted journal article supplement (doi:10.1101/gr.227462.117), 2018-04-30
Supplement: Supplemental_Fig_S17.pdf [file Supplemental_Fig_S17.pdf]

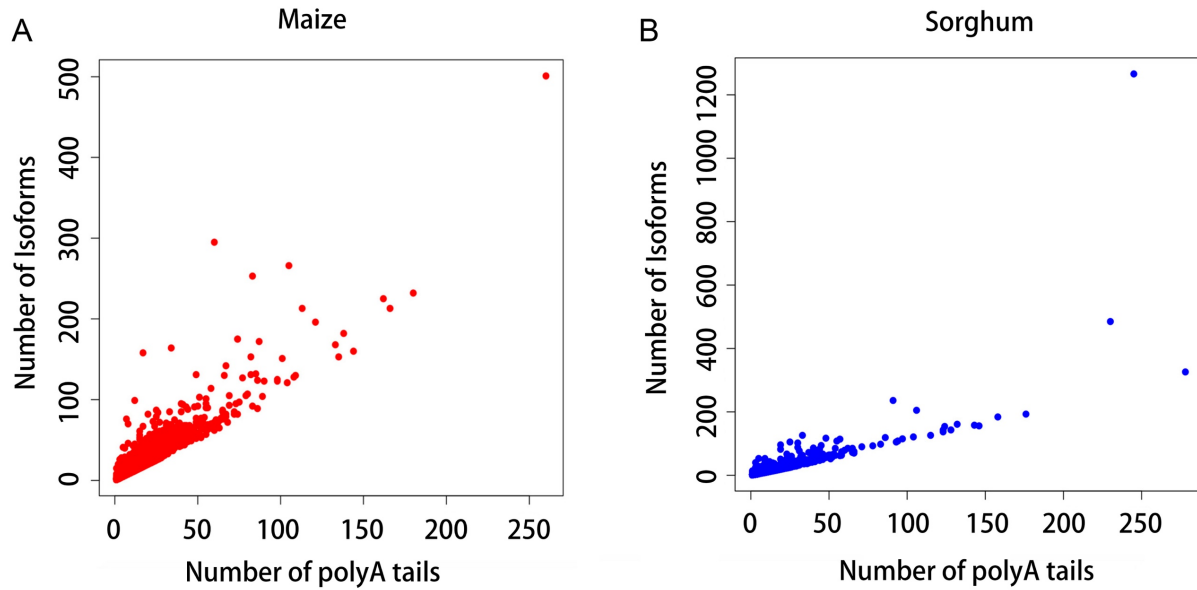

**Supplemental Figure S17: Correlation of isoform number with polyA tail number in maize and sorghum isoforms.**

**(A)** Correlation of isoform number with polyA tail number in maize. **(B)** Correlation of isoform number with polyA tail number in sorghum.
