# Supplementary material for: A comparative transcriptional landscape of maize and sorghum obtained by single-molecule sequencing
Source: HighWire-hosted journal article supplement (doi:10.1101/gr.227462.117), 2018-04-30
Supplement: Supplemental_Fig_S18.pdf [file Supplemental_Fig_S18.pdf]

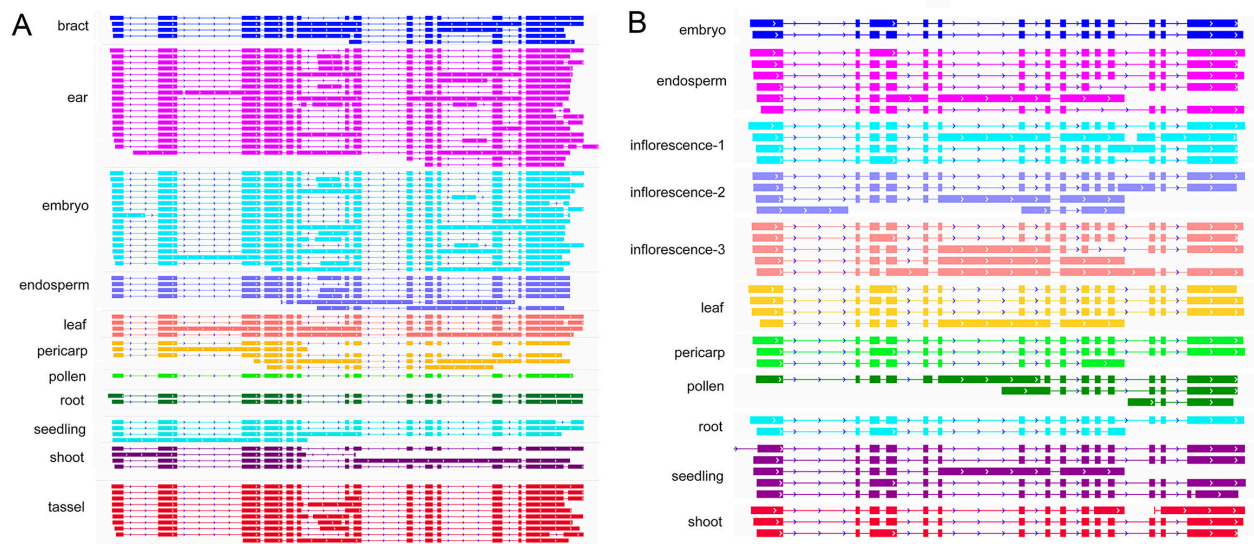

**Supplemental Figure S18: Example of different polyA cleavage sites in maize and sorghum isoforms.**

**(A)** Different polyA cleavage sites among isoforms in maize. **(B)** Different polyA cleavage sites exist among isoforms in sorghum.
