# Supplementary material for: A comparative transcriptional landscape of maize and sorghum obtained by single-molecule sequencing
Source: HighWire-hosted journal article supplement (doi:10.1101/gr.227462.117), 2018-04-30
Supplement: Supplemental_Fig_S23.pdf [file Supplemental_Fig_S23.pdf]

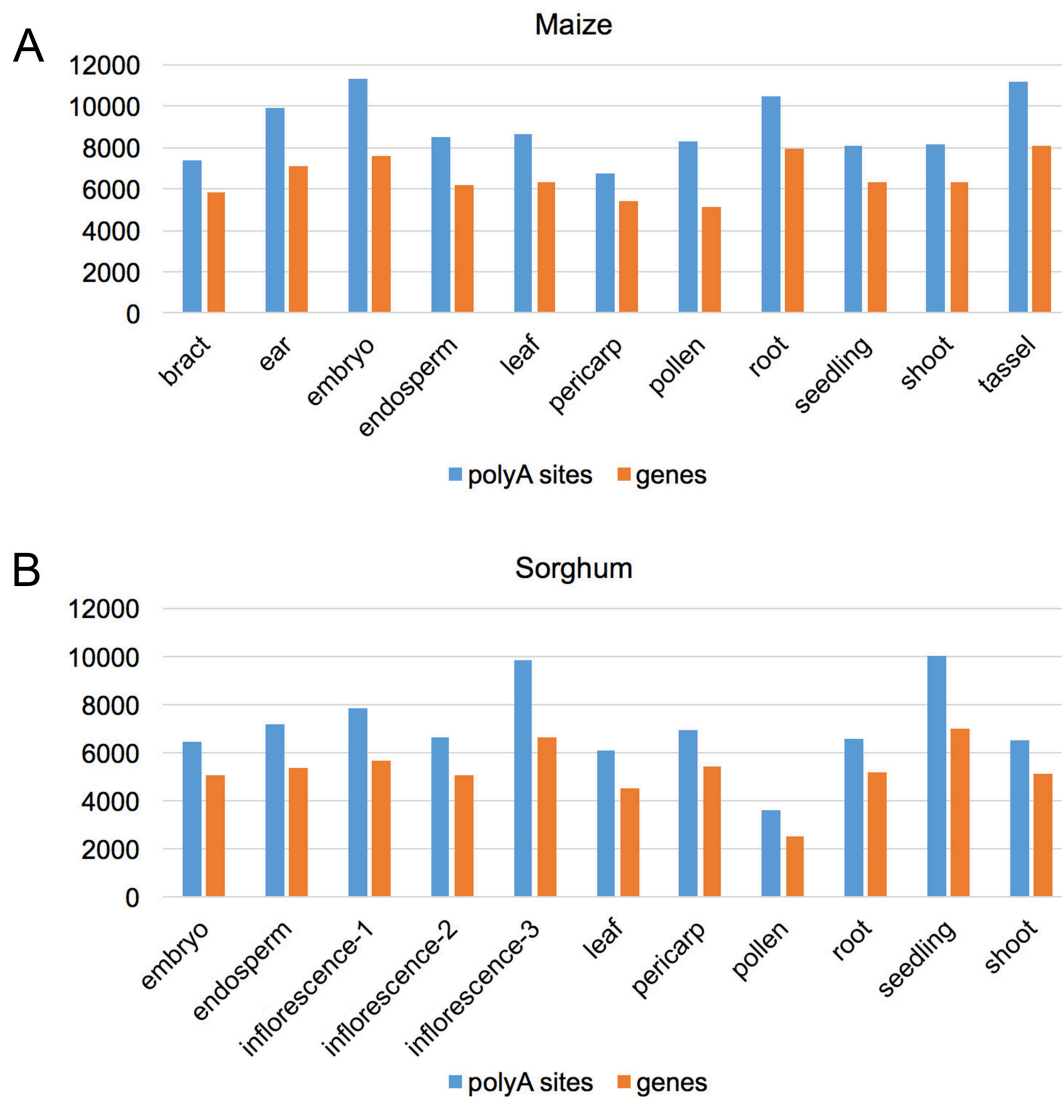

**Supplemental Figure S23: Tissue specificity of polyadenylation.**

Distribution of number of tissue-specific polyA sites and number of genes with tissue-specific polyA sites in maize (A) and sorghum (B).
