# Supplementary material for: A comparative transcriptional landscape of maize and sorghum obtained by single-molecule sequencing
Source: HighWire-hosted journal article supplement (doi:10.1101/gr.227462.117), 2018-04-30
Supplement: Supplemental_Fig_S24.pdf [file Supplemental_Fig_S24.pdf]

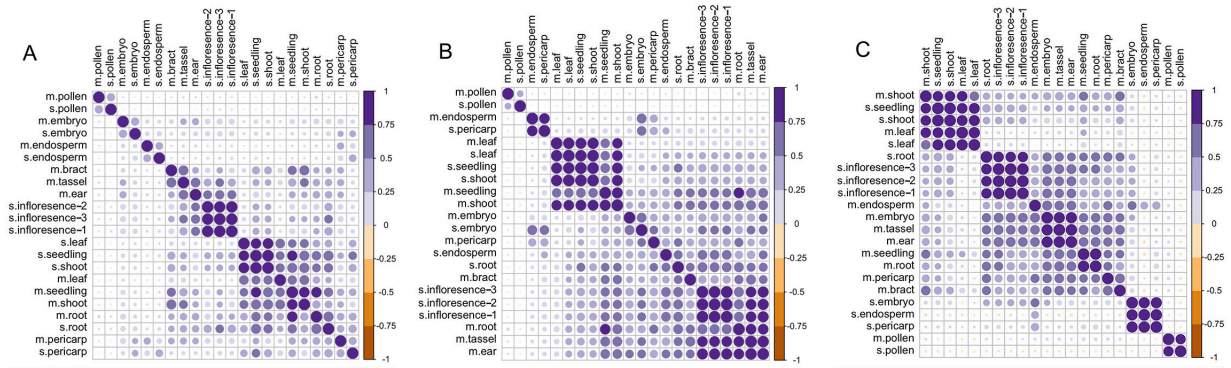

**Supplemental Figure S24: Correlation matrix of genes in maize A genome only, B genome only, and shared by A and B genome.**

Correlation matrix of: **(A)** gene expression among tissues of maize A genome unique genes. **(B)** gene expression among tissues of maize B genome unique genes. **(C)** gene expression among tissues in shared genes between maize A and B genome.
