# Supplementary material for: A comparative transcriptional landscape of maize and sorghum obtained by single-molecule sequencing
Source: HighWire-hosted journal article supplement (doi:10.1101/gr.227462.117), 2018-04-30
Supplement: Supplemental_Fig_S25.pdf [file Supplemental_Fig_S25.pdf]

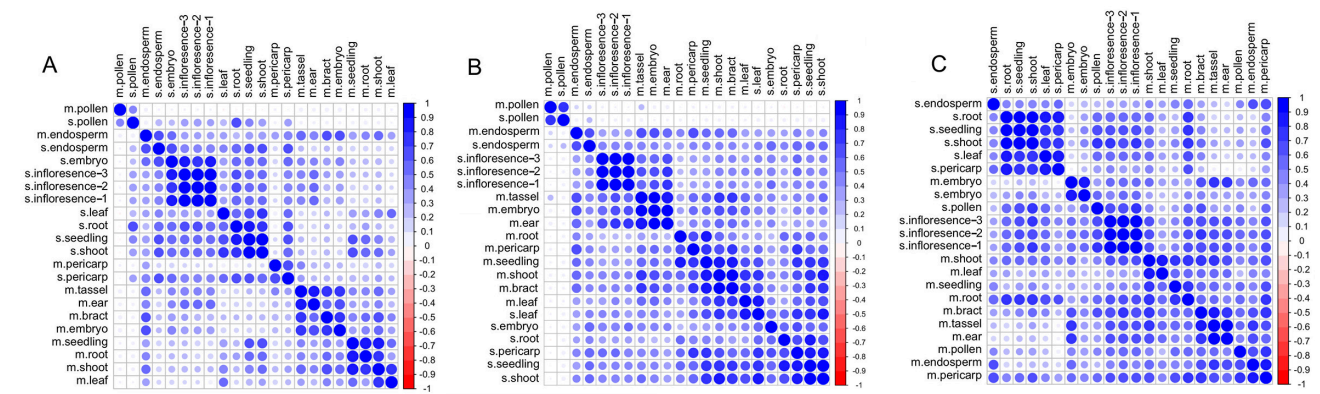

**Supplemental Figure S25: Correlation matrix of TFs in maize A genome only, B genome only, and shared by A and B genome.**

Correlation matrix of: **(A)** TFs expression among tissues of maize A genome unique TFs. **(B)** TFs expression among tissues of maize B genome unique TFs. **(C)** TFs expression among tissues in shared TFs between maize A and B genome.
