# Supplementary material for: A comparative transcriptional landscape of maize and sorghum obtained by single-molecule sequencing
Source: HighWire-hosted journal article supplement (doi:10.1101/gr.227462.117), 2018-04-30
Supplement: Supplemental_Fig_S26.pdf [file Supplemental_Fig_S26.pdf]

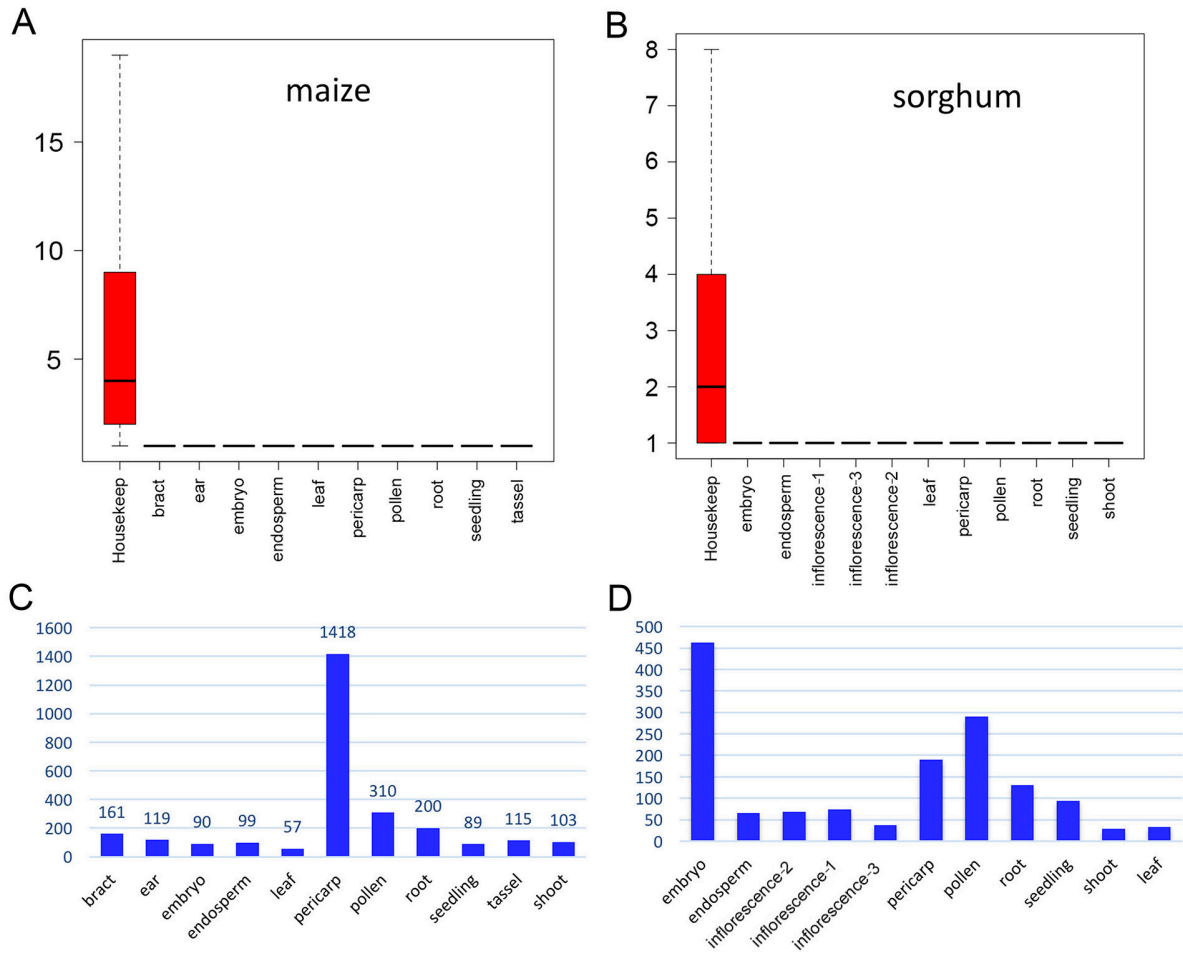

**Supplemental Figure S26: Characteristics of housekeeping genes and tissue specific genes.**

**(A)** Comparison of number of isoforms between housekeeping genes and tissue specific genes in maize. **(B)** Comparison of number of isoforms between housekeeping genes and tissue-specific genes in sorghum. **(C)** Number of tissue specific genes in each tissue in maize. **(D)** Number of tissue specific genes in each tissue in sorghum.
