# Supplementary material for: A comparative transcriptional landscape of maize and sorghum obtained by single-molecule sequencing
Source: HighWire-hosted journal article supplement (doi:10.1101/gr.227462.117), 2018-04-30
Supplement: Supplemental_Fig_S27.pdf [file Supplemental_Fig_S27.pdf]

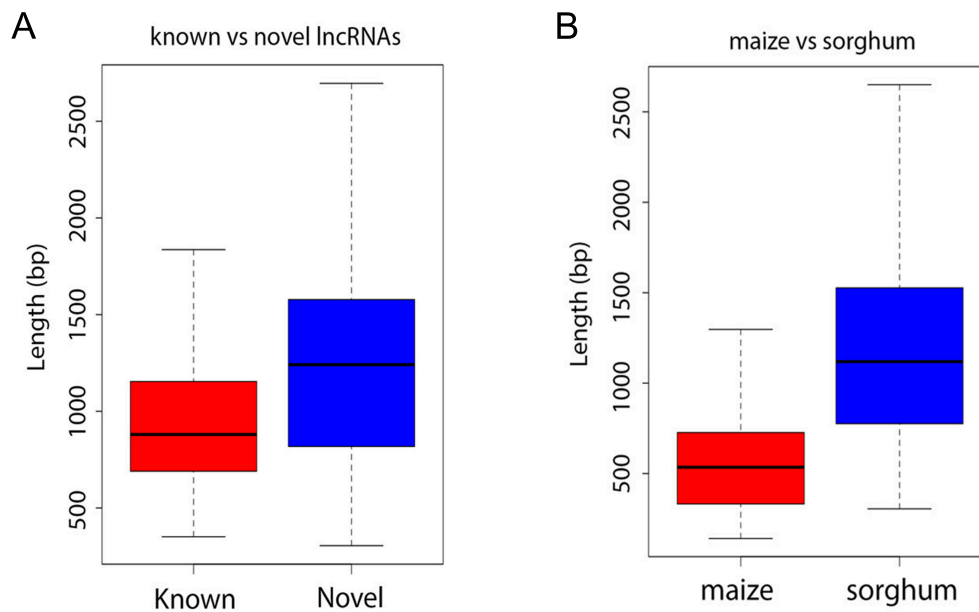

**Supplemental Figure S27: lncRNA length distribution.**

**(A)** Comparison of length between known and novel lncRNAs in sorghum.

**(B)** Comparison of lncRNA length between maize and sorghum.
