# Supplementary material for: A comparative transcriptional landscape of maize and sorghum obtained by single-molecule sequencing
Source: HighWire-hosted journal article supplement (doi:10.1101/gr.227462.117), 2018-04-30
Supplement: Supplemental_Fig_S28.pdf [file Supplemental_Fig_S28.pdf]

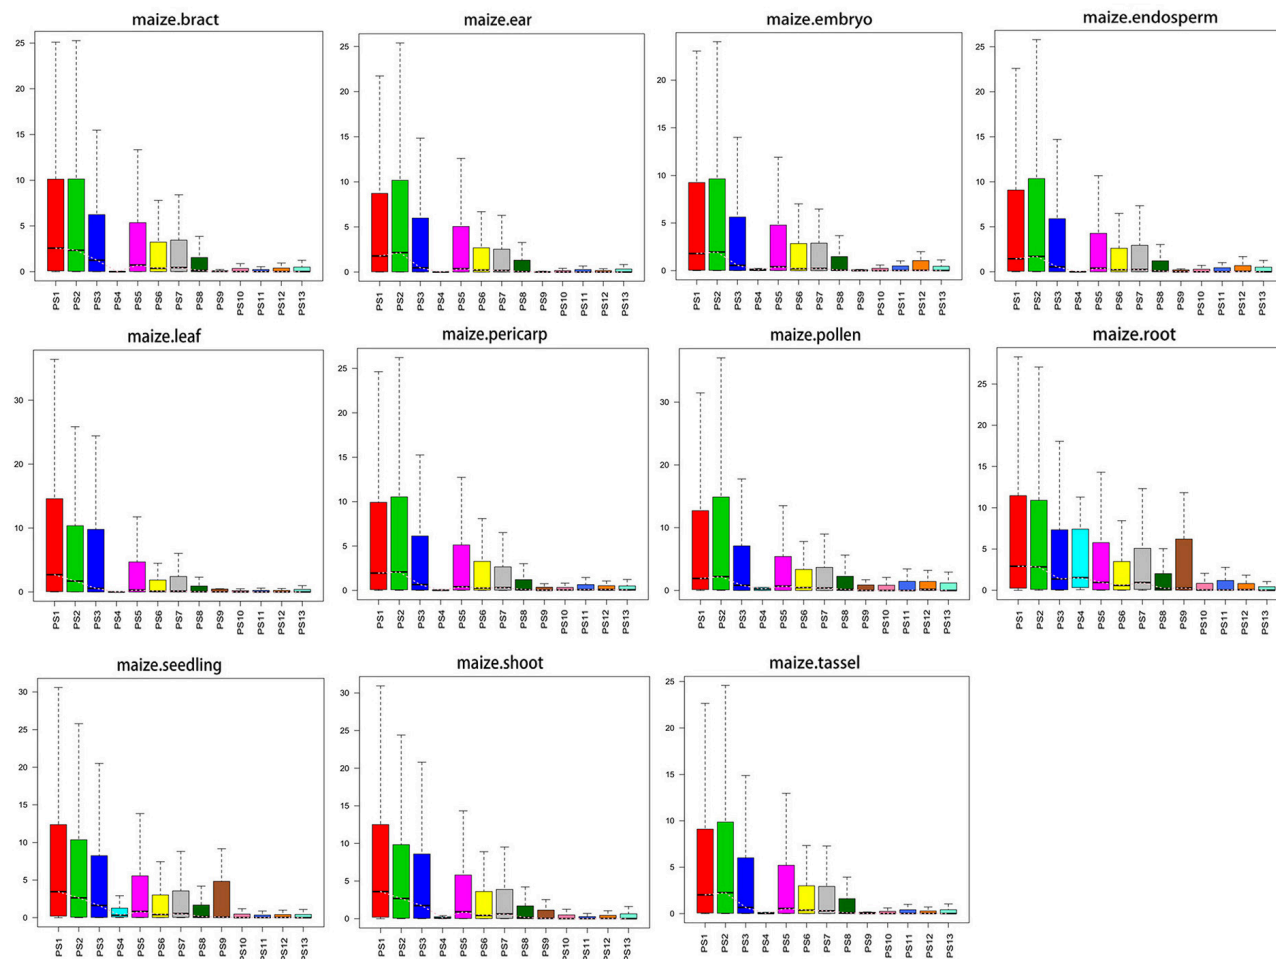

**Supplemental Figure S28: Gene expression in each tissue of maize across phylostratum (PS) ranks.**
