# Supplementary material for: A comparative transcriptional landscape of maize and sorghum obtained by single-molecule sequencing
Source: HighWire-hosted journal article supplement (doi:10.1101/gr.227462.117), 2018-04-30
Supplement: Supplemental_Fig_S32.pdf [file Supplemental_Fig_S32.pdf]

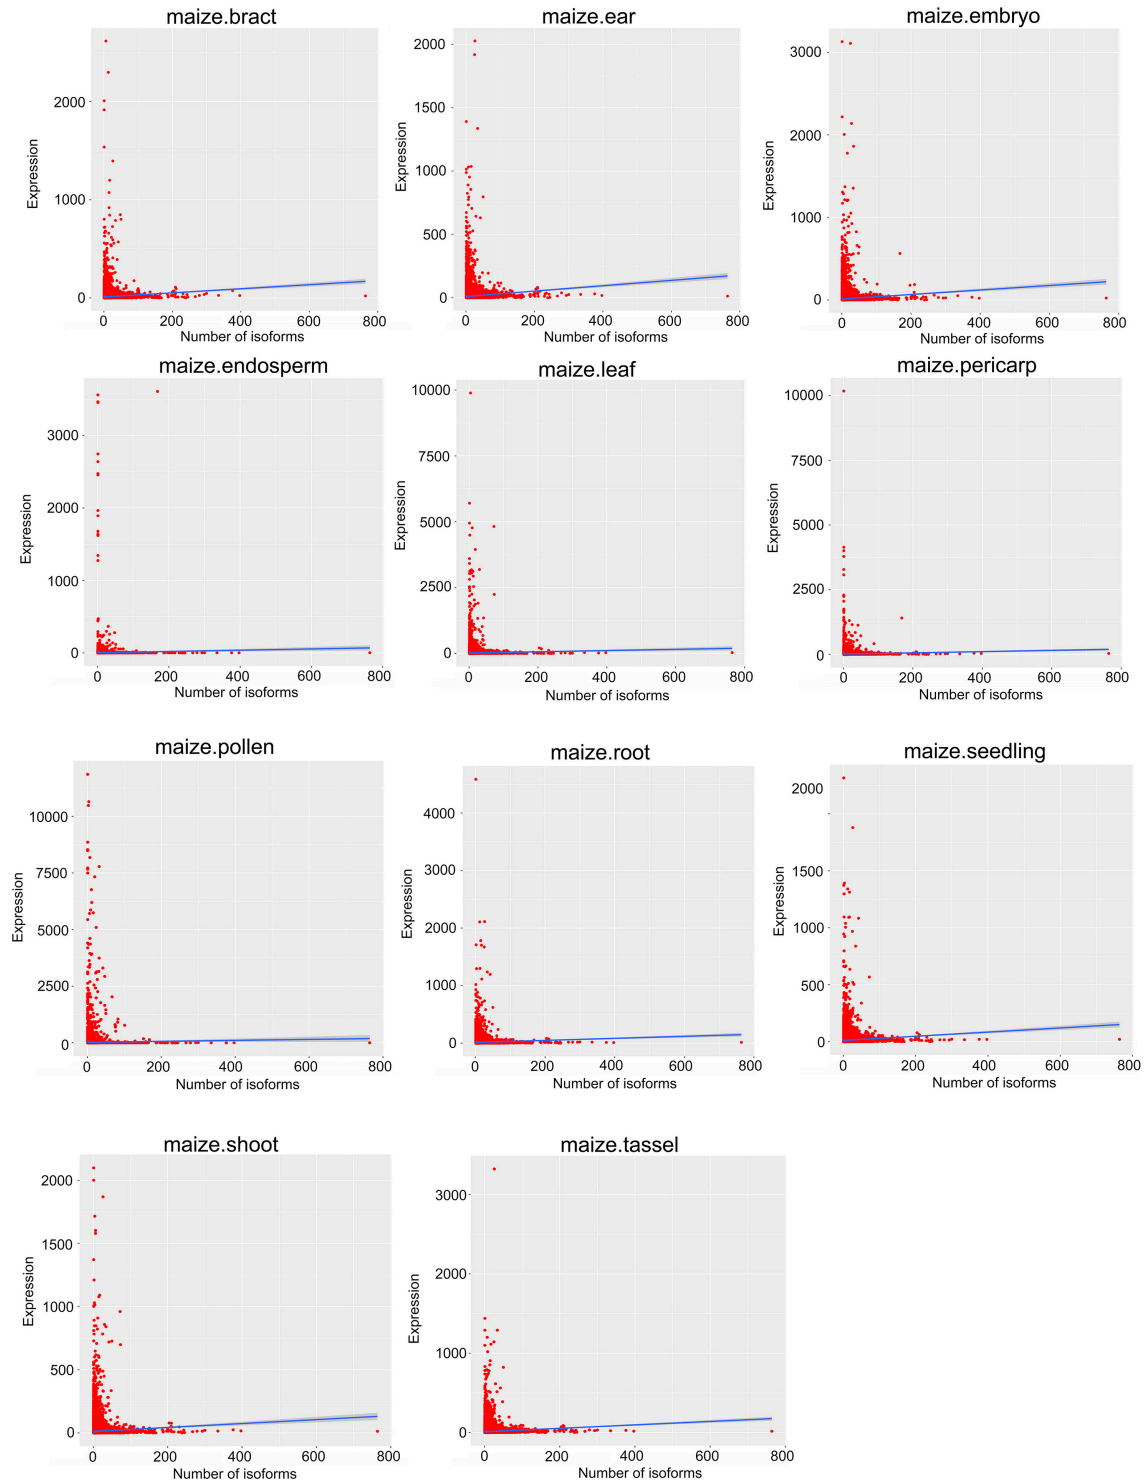

**Supplemental Figure S32: Correlation between expression value and number of isoforms among different tissues in maize.**
