# Supplementary material for: A comparative transcriptional landscape of maize and sorghum obtained by single-molecule sequencing
Source: HighWire-hosted journal article supplement (doi:10.1101/gr.227462.117), 2018-04-30
Supplement: Supplemental_Table_S4.pdf [file Supplemental_Table_S4.pdf]

**Supplemental Table 4. 16-mer barcode sequences used for PacBio barcoding libraries.**

| Oligo  | Sequence                                                                   |
|--------|----------------------------------------------------------------------------|
| dT_BC1 | AAGCAGTGGTATCAACGCAGAGTACTCAGACGATGCGTCATTTTTTTTTTTTTTTTTTTTTTTTTTTTTTVN   |
| dT_BC2 | AAGCAGTGGTATCAACGCAGAGTACCTATACATGACTCTGCTTTTTTTTTTTTTTTTTTTTTTTTTTTTTTVN  |
| dT_BC3 | AAGCAGTGGTATCAACGCAGAGTACTACTAGAGTAGCACTC TTTTTTTTTTTTTTTTTTTTTTTTTTTTTTVN |
| dT_BC4 | AAGCAGTGGTATCAACGCAGAGTACTGTGTATCAGTACATGTTTTTTTTTTTTTTTTTTTTTTTTTTTTTVN   |
| dT_BC5 | AAGCAGTGGTATCAACGCAGAGTACGATCTCTACTATATGCTTTTTTTTTTTTTTTTTTTTTTTTTTTTTTVN  |
| dT_BC6 | AAGCAGTGGTATCAACGCAGAGTACACAGTCTATACTGCTGTTTTTTTTTTTTTTTTTTTTTTTTTTTTTVN   |
| dT_BC7 | AAGCAGTGGTATCAACGCAGAGTACCATAGCGACTATCGTGTTTTTTTTTTTTTTTTTTTTTTTTTTTTTTVN  |
| dT_BC8 | AAGCAGTGGTATCAACGCAGAGTACCGAGCACGCGCGTGTGTTTTTTTTTTTTTTTTTTTTTTTTTTTTTVN   |
| dT_BC9 | AAGCAGTGGTATCAACGCAGAGTACGCTCGACTGTGAGAGATTTTTTTTTTTTTTTTTTTTTTTTTTTTTTVN  |
